# Supplementary material
Source: PubMed Central journal article supplement (PMC7675214)
Supplement: jamapsychiatry-e203598-s001.pdf [file jamapsychiatry-e203598-s001.pdf]

## Supplemental Online Content

Yen S, Peters JR, Nishar S, et al. Association of borderline personality disorder criteria with suicide attempts: findings from the collaborative longitudinal study of personality disorders over 10 years of follow-up. *JAMA Psychiatry*. Published online November 18, 2020. doi:10.1001/jamapsychiatry.2020.3598

**eTable.** Descriptives (frequency and percent or mean and standard deviation) and zero-order associations among all demographic and clinical variables

This supplemental material has been provided by the authors to give readers additional information about their work.

**Table S1.** Descriptives (frequency and percent or mean and standard deviation) and zero-order associations among all demographic and clinical variables (N = 701).

|                    | SA+      | BPD      | BPD w/o SIB | Female   | Age          | White race | Single   | High school | Unemployed | CSA      | MDD      |
|--------------------|----------|----------|-------------|----------|--------------|------------|----------|-------------|------------|----------|----------|
| M (SD) or n (%)    | 148 (21) | 245 (35) | 226 (32)    | 447 (64) | 32.55 (8.14) | 488 (70)   | 527 (75) | 189 (27)    | 433 (62)   | 211 (32) | 545 (78) |
| <b>BPD</b>         | .38***   |          |             |          |              |            |          |             |            |          |          |
| <b>BPD w/o SIB</b> | .34***   | .94***   |             |          |              |            |          |             |            |          |          |
| <b>Female</b>      | .08*     | .14***   | .14***      |          |              |            |          |             |            |          |          |
| <b>Age</b>         | -.03     | .05      | .04         | -.12**   |              |            |          |             |            |          |          |
| <b>White race</b>  | .05      | -.06     | -.06        | -.09*    | .12**        |            |          |             |            |          |          |
| <b>Single</b>      | -.03     | .03      | .02         | .00      | -.22***      | -.01       |          |             |            |          |          |
| <b>High school</b> | -.08*    | -.16***  | -.16***     | .08*     | -.12**       | -.12**     | -.04     |             |            |          |          |
| <b>Unemployed</b>  | .08*     | .13***   | .13***      | .00      | -.07         | -.13**     | -.02     | -.19***     |            |          |          |
| <b>CSA</b>         | .22***   | .20***   | .21***      | .20***   | .06          | -.07       | -.05     | -.11**      | .05        |          |          |
| <b>MDD</b>         | .02      | -.05     | -.06        | .05      | .07          | -.01       | -.03     | -.05        | .01        | -.03     |          |
| <b>AUD</b>         | .18***   | .19***   | .19***      | -.12**   | .14***       | .14***     | -.04     | -.21***     | .03        | .13**    | -.09*    |
| <b>SUD</b>         | .19***   | .20***   | .20***      | -.16***  | .21***       | .05        | -.03     | -.25***     | .08*       | .15***   | -.03     |
| <b>PTSD</b>        | .19***   | .26***   | .26***      | .16***   | .07          | -.06       | .03      | -.16***     | .11**      | .37***   | .03      |
| <b>PPD</b>         | .05      | .13***   | .14***      | -.02     | .03          | -.08*      | .03      | -.11**      | .09*       | .02      | -.07     |
| <b>STPD</b>        | -.03     | -.01     | .00         | -.16***  | .09*         | -.03       | .01*     | -.12**      | .12**      | .03      | -.13**   |
| <b>SZPD</b>        | -.02     | .04      | .06         | .03      | .06          | -.12**     | .02      | -.12**      | .00        | .04      | .01      |
| <b>AvPD</b>        | .08*     | .12**    | .13**       | .01      | -.05         | .03        | -.03     | -.01*       | .05        | .08*     | -.01     |
| <b>DPD</b>         | .05      | .24***   | .26***      | .10**    | -.08*        | -.03       | -.04     | -.10**      | .05        | .04      | -.03     |
| <b>OCPD</b>        | -.15***  | -.11**   | -.08*       | -.01     | -.04         | .00        | .00      | .13**       | -.03       | .06      | -.07     |
| <b>HPD</b>         | .01      | .12**    | .13***      | .02      | -.06         | .04        | .06      | -.04        | .02        | .07      | -.08*    |
| <b>NPD</b>         | .00      | .14***   | .16***      | -.12**   | -.04         | -.02       | .02      | .02         | -.03       | -.07     | -.05     |
| <b>ASPD</b>        | .12**    | .24***   | .23***      | -.09*    | -.02         | -.02       | .03      | -.23***     | .07        | .09*     | -.15***  |
| <b>BPD Anger</b>   | .24***   | .59***   | .58***      | .04      | .03          | -.09*      | -.02     | -.14***     | .16***     | .13**    | -.04     |
| <b>BPD Affect</b>  | .27***   | .62***   | .59***      | .14***   | -.09*        | -.11**     | .01      | -.12**      | .10**      | .15***   | -.03     |
| <b>BPD Empty</b>   | .22***   | .44***   | .44***      | .04      | .02          | -.06       | .08*     | -.13***     | .12**      | .11**    | .03      |
| <b>BPD ID</b>      | .27***   | .49***   | .50***      | .14***   | -.06         | .00        | .02      | -.03        | .01        | .13**    | -.02     |
| <b>BPD Diss</b>    | .25***   | .56***   | .56***      | .10**    | -.06         | .05        | 0        | -.13***     | .10**      | .24***   | -.06     |
| <b>BPD Aband</b>   | .23***   | .51***   | .53***      | .15***   | -.06         | -.04       | .03      | -.08*       | 0.07       | .13**    | .03      |
| <b>BPD SIB</b>     | .41***   | .57***   | .48***      | .06      | -.03         | .04        | -.02     | -.13***     | .09*       | .22***   | -.06     |
| <b>BPD Imp</b>     | .23***   | .52***   | .51***      | .00      | -.07         | -.08*      | .11**    | -.16***     | .15***     | .03      | -.09*    |
| <b>BPD Rel</b>     | .12***   | .63***   | .63***      | .13***   | -.09*        | -.01*      | .06      | -.14***     | .06        | .15***   | -.05     |

Note: \*p <.05, \*\*p <.01, \*\*\*p <.001. SA+ = Suicide attempt over 10 years of follow-up; BPD = borderline personality disorder; SIB = self-injurious behavior criterion; High school = high school education or less; CSA = childhood sexual abuse; MDD = major depressive disorder; AUD = alcohol use disorder; SUD = substance use disorder; PTSD = post-traumatic stress disorder; PPD = paranoid personality disorder; STPD = schizotypal personality disorder; SZPD = schizoid personality disorder; AvPD = avoidant personality disorder; DPD = dependent personality disorder; OCPD = obsessive compulsive personality disorder; HPD = histrionic personality

disorder; NPD = narcissistic personality disorder; ASPD = antisocial personality disorder; Affect = affective instability; empty = emptiness; ID = identity disturbance; diss = dissociation; aband = fear of abandonment; SIB = self-injurious behavior; imp = impulsivity; rel = unstable relationships.

**Table S1 continued.** Descriptives (frequency and percent or mean and standard deviation) and zero-order associations among all demographic and clinical variables (N = 701).

|                    | AUD      | SUD      | PTSD     | PPD     | STPD     | SZPD   | AvPD     | DPD    | OCPD     | HPD    | NPD    | ASPD   | BPD Anger | BPD Affect |
|--------------------|----------|----------|----------|---------|----------|--------|----------|--------|----------|--------|--------|--------|-----------|------------|
| M(SD) or n(%)      | 282 (40) | 258 (37) | 213 (30) | 92 (13) | 102 (15) | 24 (3) | 346 (49) | 45 (6) | 278 (40) | 13 (2) | 38 (5) | 52 (7) | 320 (46)  | 362 (52)   |
| <b>BPD</b>         |          |          |          |         |          |        |          |        |          |        |        |        |           |            |
| <b>BPD w/o SIB</b> |          |          |          |         |          |        |          |        |          |        |        |        |           |            |
| <b>Female</b>      |          |          |          |         |          |        |          |        |          |        |        |        |           |            |
| <b>Age</b>         |          |          |          |         |          |        |          |        |          |        |        |        |           |            |
| <b>White</b>       |          |          |          |         |          |        |          |        |          |        |        |        |           |            |
| <b>Single</b>      |          |          |          |         |          |        |          |        |          |        |        |        |           |            |
| <b>High school</b> |          |          |          |         |          |        |          |        |          |        |        |        |           |            |
| <b>Unemployed</b>  |          |          |          |         |          |        |          |        |          |        |        |        |           |            |
| <b>CSA</b>         |          |          |          |         |          |        |          |        |          |        |        |        |           |            |
| <b>MDD</b>         |          |          |          |         |          |        |          |        |          |        |        |        |           |            |
| <b>AUD</b>         |          |          |          |         |          |        |          |        |          |        |        |        |           |            |
| <b>SUD</b>         | .48***   |          |          |         |          |        |          |        |          |        |        |        |           |            |
| <b>PTSD</b>        | .10**    | .12**    |          |         |          |        |          |        |          |        |        |        |           |            |
| <b>PPD</b>         | .10**    | .02      | .13**    |         |          |        |          |        |          |        |        |        |           |            |
| <b>STPD</b>        | .06      | .02      | .04      | .32***  |          |        |          |        |          |        |        |        |           |            |
| <b>SZPD</b>        | -.01     | -.05     | -.01     | .16**   | .19**    |        |          |        |          |        |        |        |           |            |
| <b>AvPD</b>        | .01**    | .00      | .08*     | .12**   | .01      | .11**  |          |        |          |        |        |        |           |            |
| <b>DPD</b>         | .00      | -.02     | .08*     | .07     | -.03     | -.02   | .19***   |        |          |        |        |        |           |            |
| <b>OCPD</b>        | -.07     | -.11**   | -.02     | .11**   | -.05     | -.02   | -.06     | .02    |          |        |        |        |           |            |
| <b>HPD</b>         | .04      | .03      | .02      | .07     | .12**    | .03    | .03      | .14*** | .11**    |        |        |        |           |            |
| <b>NPD</b>         | .00      | -.03     | -.05     | .11**   | .13***   | -.05   | 0        | .09*   | .09*     | .23*** |        |        |           |            |
| <b>ASPD</b>        | .21***   | .26***   | .14***   | .01**   | .08*     | .01    | .05      | .08*   | -.03     | .08*   | .12**  |        |           |            |
| <b>BPD Anger</b>   | .12**    | .15**    | .21**    | .17**   | .07      | .08*   | .14**    | .12**  | .01      | .11**  | .01**  | .20**  |           |            |
| <b>BPD Affect</b>  | .16***   | .16***   | .24***   | .09*    | -.02     | .04    | .07      | .16**  | .03      | .11**  | .13**  | .17*** | .45***    |            |
| <b>BPD Empty</b>   | .13**    | .01*     | .17***   | .17***  | .04      | .13**  | .22**    | .11**  | -.03     | .08*   | .07    | .10**  | .28***    | .27***     |
| <b>BPD ID</b>      | .11**    | .06      | .16***   | .09*    | .05      | .13*** | .19***   | .18*** | -.05     | .14*** | .20*** | .01**  | .27***    | .37***     |
| <b>BPD Diss</b>    | .12**    | .12**    | .29**    | .16***  | .13**    | .03    | .11**    | .19*** | -.03     | .11**  | .01**  | .08*   | .35***    | .39***     |
| <b>BPD Aband</b>   | .02      | .07      | .21**    | .01*    | -.04     | .04    | .12**    | .22*** | -.01     | .08*   | .11**  | .13*** | .31***    | .33***     |
| <b>BPD SIB</b>     | .15***   | .15***   | .21***   | .09*    | -.02     | .02    | .08*     | .22*** | -.12**   | .05    | .07*   | .19*** | .32***    | .36***     |
| <b>BPD Imp</b>     | .27***   | .23***   | .13***   | .12**   | 0.00     | -.03   | .05      | .09*   | -.04     | .07    | .07    | .20*** | .40***    | .33***     |
| <b>BPD Rel</b>     | .14***   | .15***   | .23***   | .15***  | 0.04     | .01    | .14***   | .25*** | -.01     | .13*** | .15*** | .25*** | .44***    | .42***     |

Note: \*p <.05, \*\*p <.01, \*\*\*p <.001. SA+ = Suicide attempt over 10 years of follow-up; BPD = borderline personality disorder; SIB = self-injurious behavior criterion; High school = high school education or less; CSA = childhood sexual abuse; MDD = major depressive disorder; AUD = alcohol use disorder; SUD = substance use disorder; PTSD = post-traumatic stress disorder; PPD = paranoid personality disorder; STPD = schizotypal personality disorder; SZPD = schizoid personality disorder; AvPD = avoidant personality disorder; DPD = dependent personality disorder; OCPD = obsessive compulsive personality disorder; HPD = histrionic personality

disorder; NPD = narcissistic personality disorder; ASPD = antisocial personality disorder; Affect = affective instability; empty = emptiness; ID = identity disturbance; diss = dissociation; aband = fear of abandonment; SIB = self-injurious behavior; imp = impulsivity; rel = unstable relationships.

**Table S1 continued.** Descriptives (frequency and percent or mean and standard deviation) and zero-order associations among all demographic and clinical variables (N = 701).

|                    | <b>BPD Empty</b> | <b>BPD ID</b> | <b>BPD Diss</b> | <b>BPD Aband</b> | <b>BPD SIB</b> | <b>BPD Imp</b> | <b>BPD Rel</b> |
|--------------------|------------------|---------------|-----------------|------------------|----------------|----------------|----------------|
| M(SD) or n(%)      | 292 (42)         | 212 (30)      | 218 (31)        | 190 (27)         | 171 (24)       | 318 (45)       | 267 (38)       |
| <b>BPD</b>         |                  |               |                 |                  |                |                |                |
| <b>BPD w/o SIB</b> |                  |               |                 |                  |                |                |                |
| <b>Female</b>      |                  |               |                 |                  |                |                |                |
| <b>Age</b>         |                  |               |                 |                  |                |                |                |
| <b>White</b>       |                  |               |                 |                  |                |                |                |
| <b>Single</b>      |                  |               |                 |                  |                |                |                |
| <b>High school</b> |                  |               |                 |                  |                |                |                |
| <b>Unemployed</b>  |                  |               |                 |                  |                |                |                |
| <b>CSA</b>         |                  |               |                 |                  |                |                |                |
| <b>MDD</b>         |                  |               |                 |                  |                |                |                |
| <b>AUD</b>         |                  |               |                 |                  |                |                |                |
| <b>SUD</b>         |                  |               |                 |                  |                |                |                |
| <b>PTSD</b>        |                  |               |                 |                  |                |                |                |
| <b>PPD</b>         |                  |               |                 |                  |                |                |                |
| <b>STPD</b>        |                  |               |                 |                  |                |                |                |
| <b>SZPD</b>        |                  |               |                 |                  |                |                |                |
| <b>AvPD</b>        |                  |               |                 |                  |                |                |                |
| <b>DPD</b>         |                  |               |                 |                  |                |                |                |
| <b>OCPD</b>        |                  |               |                 |                  |                |                |                |
| <b>HPD</b>         |                  |               |                 |                  |                |                |                |
| <b>NPD</b>         |                  |               |                 |                  |                |                |                |
| <b>ASPD</b>        |                  |               |                 |                  |                |                |                |
| <b>BPD Anger</b>   |                  |               |                 |                  |                |                |                |
| <b>BPD Affect</b>  |                  |               |                 |                  |                |                |                |
| <b>BPD Empty</b>   |                  |               |                 |                  |                |                |                |
| <b>BPD ID</b>      | .29***           |               |                 |                  |                |                |                |
| <b>BPD Diss</b>    | .29***           | .37***        |                 |                  |                |                |                |
| <b>BPD Aband</b>   | .24***           | .26***        | .28***          |                  |                |                |                |
| <b>BPD SIB</b>     | .29***           | .33***        | .38***          | .35***           |                |                |                |
| <b>BPD Imp</b>     | .26***           | .17***        | .29***          | .25***           | .30***         |                |                |
| <b>BPD Rel</b>     | .24***           | .34***        | .32***          | .43***           | .33***         | .41***         |                |

Note: \*p <.05, \*\*p <.01, \*\*\*p <.001. SA+ = Suicide attempt over 10 years of follow-up; BPD = borderline personality disorder; SIB = self-injurious behavior criterion; High school = high school education or less; CSA = childhood sexual abuse; MDD = major depressive disorder; AUD = alcohol use disorder; SUD = substance use disorder; PTSD = post-traumatic stress disorder; PPD = paranoid personality disorder; STPD = schizotypal personality disorder; SZPD = schizoid personality disorder; AvPD = avoidant personality disorder; DPD = dependent personality disorder; OCPD = obsessive compulsive personality disorder; HPD = histrionic personality

disorder; NPD = narcissistic personality disorder; ASPD = antisocial personality disorder; Affect = affective instability; empty = emptiness; ID = identity disturbance; diss = dissociation; aband = fear of abandonment; SIB = self-injurious behavior; imp = impulsivity; rel = unstable relationships.
